# Supplementary material for: The kidney, subclinical thyroid disease and cardiovascular outcomes in older patients
Source: PubMed Central journal article supplement — Endocr Connect. 2019 Dec 17;9(1):55–62. doi: 10.1530/EC-19-0502 (PMC6993270; doi:10.1530/ec-19-0502), 2019-12-17
Supplement: supplementary_figure_1.pdf [file supplementary_figure_1.pdf]

**PROSPER**  
n = 5804

**Exclusion overt thyroid disease**  
- Hyperthyroidism at baseline n = 45  
- Hyperthyroidism at 6 months n = 96  
- Hypothyroidism at baseline n = 41  
- Hypothyroidism at 6 months n = 244

**Exclusion medication use**  
- Thyroxin treatment n = 237  
- Antithyroid treatment n = 23  
- Lithium treatment n = 7  
- Amiodaron treatment n = 27

**Exclusion missing values**  
- Missing creatinine n = 8  
- Missing baseline TSH n = 8

**Inclusion**  
n = 5130

**Thyroid status**  
based on TSH at 0 and 6 months

**Exclusion**  
n = 266  
patients in different categories at 0 and 6 months

**Inclusion**  
n = 4864

|                     |                         |                      |
|---------------------|-------------------------|----------------------|
| eGFR <45<br>n = 656 | eGFR <45-60<br>n = 1933 | eGFR >60<br>n = 2275 |
|---------------------|-------------------------|----------------------|

|                                                            |        |        |        |
|------------------------------------------------------------|--------|--------|--------|
| Subclinical hyperthyroidism<br>TSH < 0.45 mIU/l<br>n = 109 | n = 14 | n = 35 | n = 60 |
|------------------------------------------------------------|--------|--------|--------|

|                                                     |         |          |          |
|-----------------------------------------------------|---------|----------|----------|
| Euthyroidism<br>TSH = 0.45 – 4.49 mIU/l<br>n = 4573 | n = 615 | n = 1830 | n = 2128 |
|-----------------------------------------------------|---------|----------|----------|

|                                                          |        |        |        |
|----------------------------------------------------------|--------|--------|--------|
| Subclinical hypothyroidism<br>TSH ≥ 4.5 mIU/l<br>n = 182 | n = 27 | n = 68 | n = 87 |
|----------------------------------------------------------|--------|--------|--------|
